# Supplementary material
Source: publisher figshare collection journal article supplement (https://asha.figshare.com/articles/dataset/_/20323593)
Supplement: Supplementary file 1 [file 1]

**Supplemental Material S1.** Otoacoustic emission (OAE) types and acronyms used in the article.

| OAE Name                             | Acronym      | Evoking Stimuli                                           | Measurement                                                                                                                            | Comments                                                                                                        |
|--------------------------------------|--------------|-----------------------------------------------------------|----------------------------------------------------------------------------------------------------------------------------------------|-----------------------------------------------------------------------------------------------------------------|
| <b>Reflection Type OAE</b>           |              |                                                           |                                                                                                                                        |                                                                                                                 |
| Stimulus-frequency                   | <b>SFOAE</b> | Pure tone                                                 | Derived via various methods (i.e., with suppressor tone or difference in stimuli presentation level)                                   | Contains short and long latency components                                                                      |
| Transient-evoked                     | <b>TEOAE</b> | Transient stimulus (either tone-bursts, click, or chirps) | Averaged in the time domain and converted to frequency following elimination of stimulus artifact                                      | Contains short and long latency components                                                                      |
| Short Latency Component              | <b>SL</b>    |                                                           | Isolated in the time domain from a measured TEOAE or SFOAE                                                                             | Grows linear in response to increasing stimuli level and originates from multiple areas on the basilar membrane |
| Long Latency Component               | <b>LL</b>    |                                                           | Isolated in the time domain from a measured TEOAE or SFOAE                                                                             | Grow compressively (non-linear) and is thought to originate from the peak of the traveling wave                 |
| Spontaneous                          | <b>SOAE</b>  | Non-evoked, naturally occurring OAE                       | Can be recorded in many ears                                                                                                           | Not measured in the current study                                                                               |
| <b>Compound OAE</b>                  |              |                                                           |                                                                                                                                        |                                                                                                                 |
| Distortion Product                   | <b>DPOAE</b> | Two eliciting primary tones ( $f_1$ and $f_2$ ).          | Is a vector sum of a nonlinear distortion and reflection type OAE<br>Averaged in the time domain and evaluated in the frequency domain | Measured routinely in clinical settings.                                                                        |
| <b>Nonlinear Distortion Type OAE</b> |              |                                                           |                                                                                                                                        |                                                                                                                 |
| Nonlinear Distortion                 | <b>NDOAE</b> |                                                           | Mathematically derived from measured DPOAEs                                                                                            | Arises from the nonlinear interaction of the two primary-tone traveling waves at the $f_2$ tonotopic place      |
